# Supplementary material
Source: publisher site journal article supplement (https://www.dovepress.com/article/378081)
Supplement: Supplementary file 1 [file get_supplementary_file.php]

**Supplementary Material 1. Interview Guide - English version**

Interview Guide

*Individual Level*

- - 1. Please tell me what you think – in general – about the COVID-19 pandemic.
    2. What are your main concerns, if any, regarding COVID-19 vaccines?

Probes:

- - - - Safety or lack of safety
      - How well they work or do not work
      - The possibility of side effects
    1. What do you think are the main benefits, if any, of the COVID-19 vaccines?

Probes:

- - - - Why?
    1. Have you been vaccinated against COVID-19 or do you have a scheduled vaccine appointment?

Probes:

- - - - What are your reasons for doing this (or not doing this)?

*Interpersonal Level*

1. What kinds of conversations, if any, do you have with members of your community regarding the COVID-19 vaccine?
2. How have the COVID-19 vaccination experiences of you and your family and friends influenced your opinions about the vaccine?

Probes:

- - - - What about experiences with the COVID-19 infection?
      - Do you know anyone who has had a bad reaction to the vaccine? When you hear a negative story related to the vaccines, what do you do?
      - Do you ever hear positive vaccine stories? What are they?

*Organizational/Community Level*

1. What is the most common information source you turn to for information about the COVID-19 vaccine?

Probes:

- - - - Why?
      - How comfortable are you/would you be discussing your vaccination concerns with your doctor? Why/why not?

1. How likely are you to trust information about the COVID-19 vaccine when it comes from your doctor? Why/why not?

Probes:

- - - - What about when it comes from the government (local or national)?
      - And when it comes from public health experts?

*Public Policy Level*

1. What barriers do you think get in the way of people in your community getting vaccinated?

Probes:

- - - - [If they said they were not vaccinated yet] What do you think would make you more likely to get vaccinated?
      - What do you think would make people in your community more likely to get vaccinated?

1. Thank you. Before we move onto the next section, I have one final question. What specific messages would you like to see about the COVID-19 vaccine in your community?

**Supplementary Material 2. Consolidated criteria for reporting qualitative studies (COREQ) 32-item checklist**

| No. | Item | | Guide questions/description | | | | | | Response/page number | | |
| --- | --- | --- | --- | --- | --- | --- | --- | --- | --- | --- | --- |
| **Domain 1: Research team and reflexivity** | | | | | | | | | | | |
| *Personal characteristics* | | | |  | | | |  | | | |
| 1. | | Interviewer/facilitators | | Which author/s conducted the interview? | | | | Page 5 (Data Collection): Reported in Methods under Data Collection section. | | | |
| 2. | | Credentials | | What were the researcher’s credentials? | | | | Interviewers were SWL and AZ. SWL is a doctoral student (bilingual, with experience in qualitative research) and AZ is a research coordinator with a bachelor’s degree (bilingual). | | | |
| 3. | | Occupation | | What was their occupation at the time of the study? | | | | SWL was a doctoral student and AZ was a research coordinator at the time of the study. | | | |
| 4. | | Gender | | Was the researcher male or female | | | | The interviewers identified as female. | | | |
| 5. | | Experience and training | | What experience or training did the researcher have? | | | | The interviewers are both bilingual. SWL has experience in qualitative research, 4 years of experience working in Latin America, and experience leading Spanish-language outreach programs. AZ is a native Spanish-speaker, has a bachelor’s degree and extensive experience working in participant-facing research. | | | |
| *Relationship with participants* | | | | | | | | | | | |
| 6. | | Relationship established | | Was a relationship established prior to the study commencement? | | | | The interviewers had no prior relationships with the research participants. | | | |
| 7. | | Participant knowledge of the interviewer | | What did the participants know about the researcher? E.g. personal goals, reasons for doing the research. | | | | Research participants were aware of the goals of the study based on information provided by the interviewer at the time of recruitment and consent. | | | |
| 8. | | Interviewer characteristics | | What characteristics were reported about the interviewer/facilitator? e.g. Bias, assumptions, reasons and interests in the research topic. | | | | No characteristics were reported to participants. | | | |
| **Domain 2: Study design** | | | | | | | | | | | |
| *Theoretical framework* | | | | | | | | | | | |
| 9. | | Methodological orientation and theory | | | What methodological orientation was stated to underpin the study? E.g. grounded theory, discourse analysis, ethnography, phenomenology, content analysis. | | | | Page 6 (Data Analysis): Qualitative thematic analysis was used to identify key themes. | | |
| *Participant selection* | | | | | | | | | | | |
| 10. | | Sampling | | | How were participants selected? E.g. purposive, convenience, consecutive, snowball | | | | Page 4 (Participants): We used purposive and snowball sampling to recruit participants. | | |
| 11. | | Method of approach | | | How were participants approached? (e.g. face-to-face, telephone, mail, email) | | | | Page 4 (Participants): We used social media (Craigslist) and ongoing studies. | | |
| 12. | | Sample size | | | How many participants were in the study? | | | | Page 7 (Sample Characteristics): 15 participants were interviewed. | | |
| 13. | | Non-participation | | | How many people refused to participate or dropped out? Reasons? | | | | Not applicable - all who signed up for interviews took part. No one dropped out. | | |
| *Setting* | | | | | | | | | | | |
| 14. | | Setting of data collection | | | Where was the data collected? E.g. home, clinic, workplace | | | | Page 5 (Data Collection): interviews were conducted virtually via Zoom. | | |
| 15. | | Presence of non-participants | | | Was anyone else present besides the participants and researchers? | | | | Not applicable - no other people were present during the interviews. | | |
| 16. | | Description of sample | | | What are the important characteristics of the sample (e.g. demographic data) | | | | Page 7 (Sample Characteristics); Table I | | |
| *Data Collection* | | | | | | | | | | | |
| 17. | | Interview guide | | | Were questions, prompts, guides provided by the authors? Was it pilot tested? | | | | Page 5 (Data Collection): Interview guide was developed by authors based on a review of literature and Socio-Ecological Model as a conceptual framework. Interview guide is provided in Appendix 2. | | |
| 18. | | Repeat interviews | | | | Were repeat interviews carried out? If yes, how many? | | | Not applicable - interviews were only conducted once. | | |
| 19. | | Audio/visual recording | | | | Did the research use audio or visual recording to collect the data? | | | Page 7 (Procedures): Audio recordings were collected. | | |
| 20. | | Field notes | | | | Were field notes made | | | Yes, field notes were taken in RedCap, and the data consisted of interview transcripts as well. | | |
| 21. | | Duration | | | | What was the duration of the interviews or focus groups? | | | Page 6 (Data Collection): Interviews lasted 30-45 minutes. | | |
| 22. | | Data saturation | | | | Was data saturation discussed? | | | Page 6 (Data Analysis): Data saturation was reached. | | |
| 23. | | Transcripts returned | | | | Were transcripts returned to participants for comment and/or correction? | | | Not applicable - transcripts were not returned to participants. | | |
| **Domain 3: Analysis and findings** | | | | | | | | | | | |
| *Data analysis* | | | | | | | | | | | |
| 24. | | Number of data coders | | | | | How many data coders coded the data? | | | Page 6 (Data Analysis): Data was analyzed by two coders (SWL, AP). | |
| 25. | | Description of the coding tree | | | | | Did authors provide a description of the coding tree? | | | Table II: Coding structure is represented in our tables. | |
| 26. | | Derivation of themes | | | | | Were themes identified in advanced or derived from the data? | | | Page 6 (Data Analysis): Themes were derived both inductively and deductively. | |
| 27. | | Software | | | | | What software, if applicable, was used to manage the data? | | | Page 6 (Data Analysis): Interviews were analyzed in NVivo, release 1.4.1. | |
| 28. | | Participant checking | | | | | Did participants provide feedback on the findings? | | | Not applicable - participants did not provide feedback on the findings. | |
| *Reporting* | | | | | | | | | | | |
| 29. | | Quotations presented | | | | Were participant quotations presented to illustrate the themes/findings? What each quotation identified? E.g. participant number. | | | | | Page 7-14 (Results); Table II |
| 30. | | Data and findings consistent | | | | Was there consistency between the data presented and the findings? | | | | | Page 7-14 (Results): Findings presented represent the data. |
| 31. | | Clarity of major themes | | | | Were major themes clearly presented in the findings? | | | | | Page 7-14 (Results): Major themes are presented in our results. |
| 32. | | Clarity of minor themes | | | | Is there a description of diverse cases or discussion of minor themes? | | | | | Page 7-14 (Results): Within each theme, we also discuss sub-themes and a diversity of responses. |
